# Supplementary material for: Particular genomic and virulence traits associated with preterm infant-derived toxigenic Clostridium perfringens strains
Source: Springer Nature journal article supplement (doi:10.1038/s41564-023-01385-z), 2023-05-25
Supplement: MOESM1 [file 41564_2023_1385_MOESM1_ESM.pdf]

# Particular genomic and virulence traits associated with preterm infant-derived toxigenic *Clostridium perfringens* strains

---

In the format provided by the  
authors and unedited

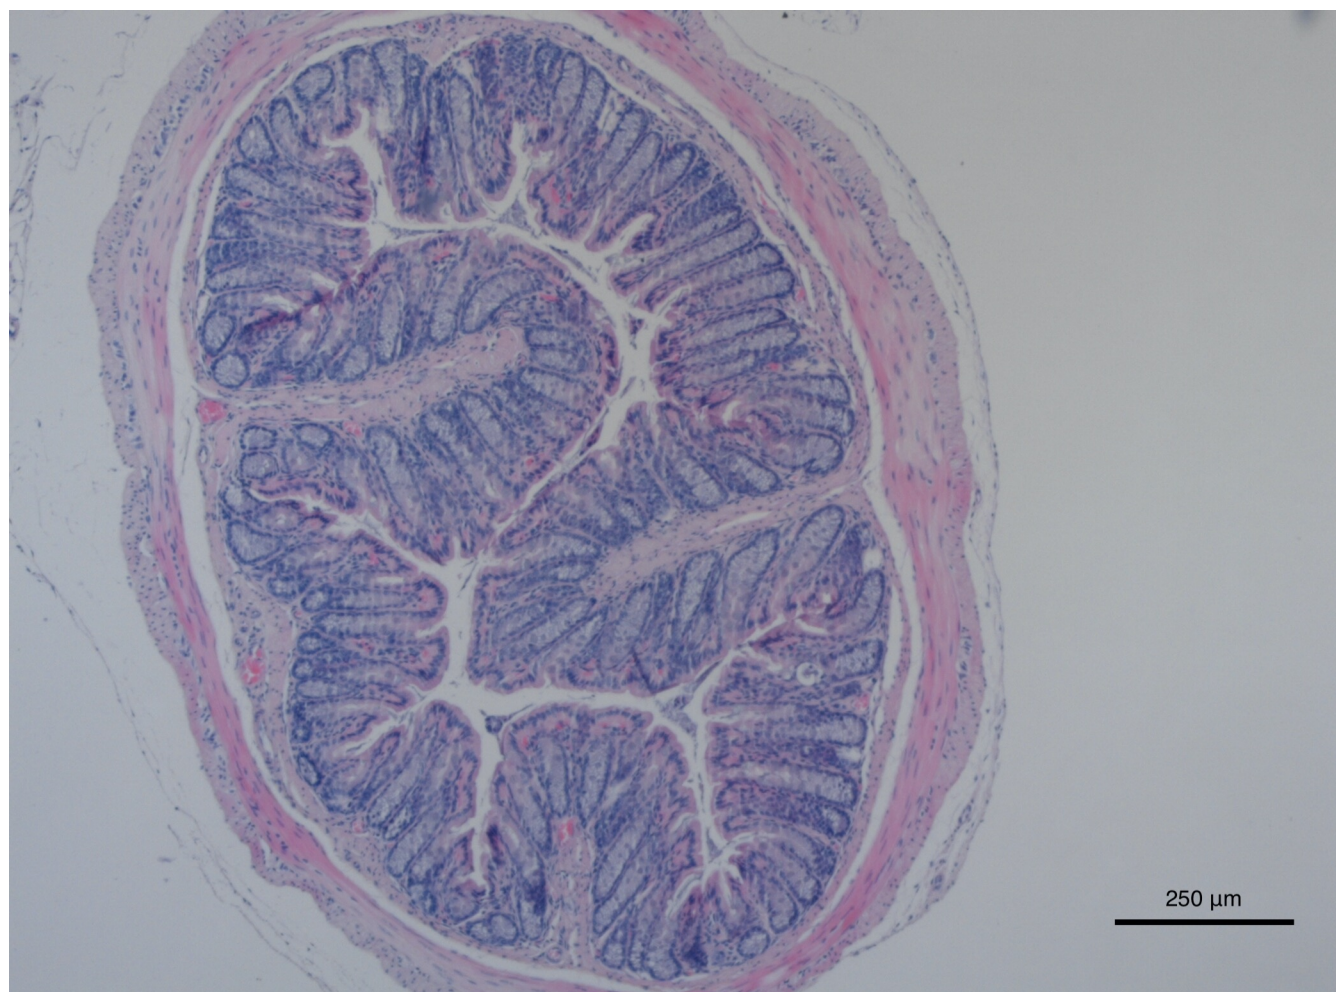

**Supplementary Fig. 1. Representative H&E-stained murine distal colonic section of Control group.**

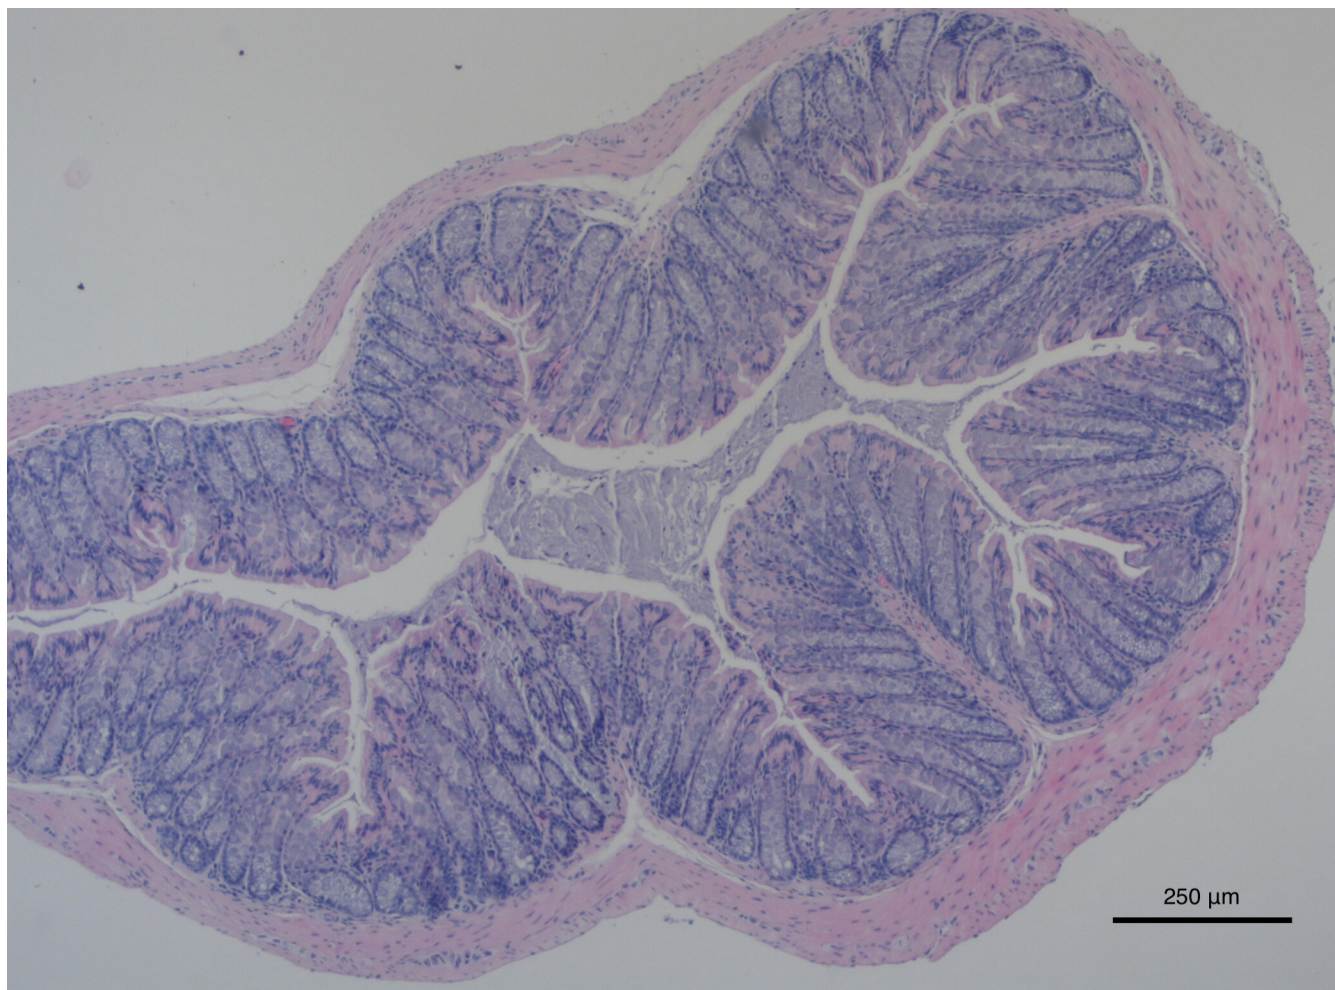

**Supplementary Fig. 2. Representative H&E-stained murine distal colonic section of ABX group.**



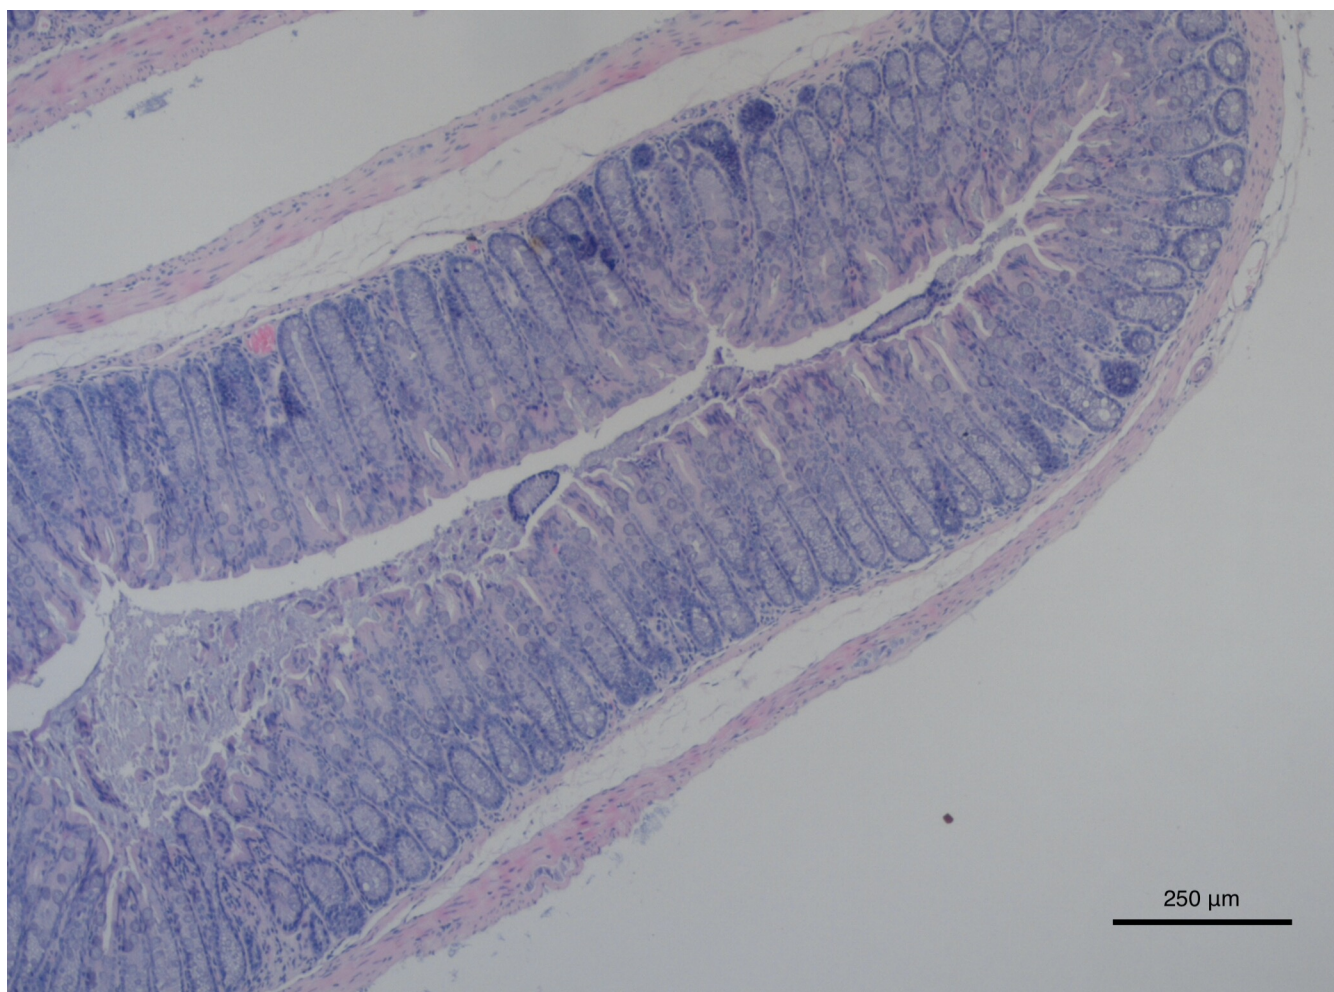

**Supplementary Fig. 3. Representative H&E-stained murine distal colonic section of *pfoA*<sup>+</sup> strain IQ146.**

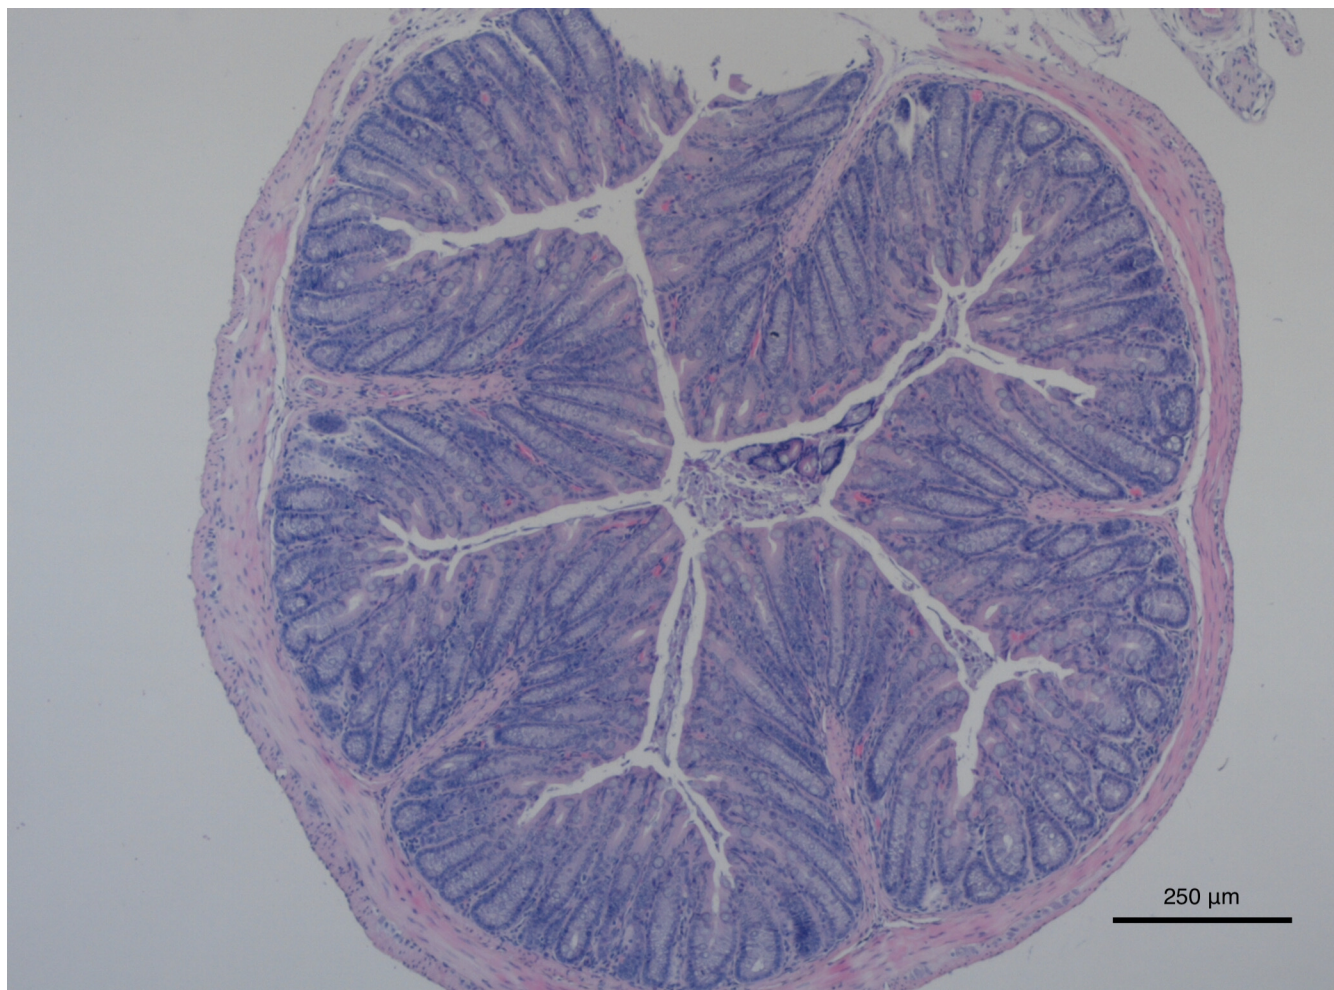

**Supplementary Fig. 4. Representative H&E-stained murine distal colonic section of *pfoA*<sup>+</sup> strain IQ129.**



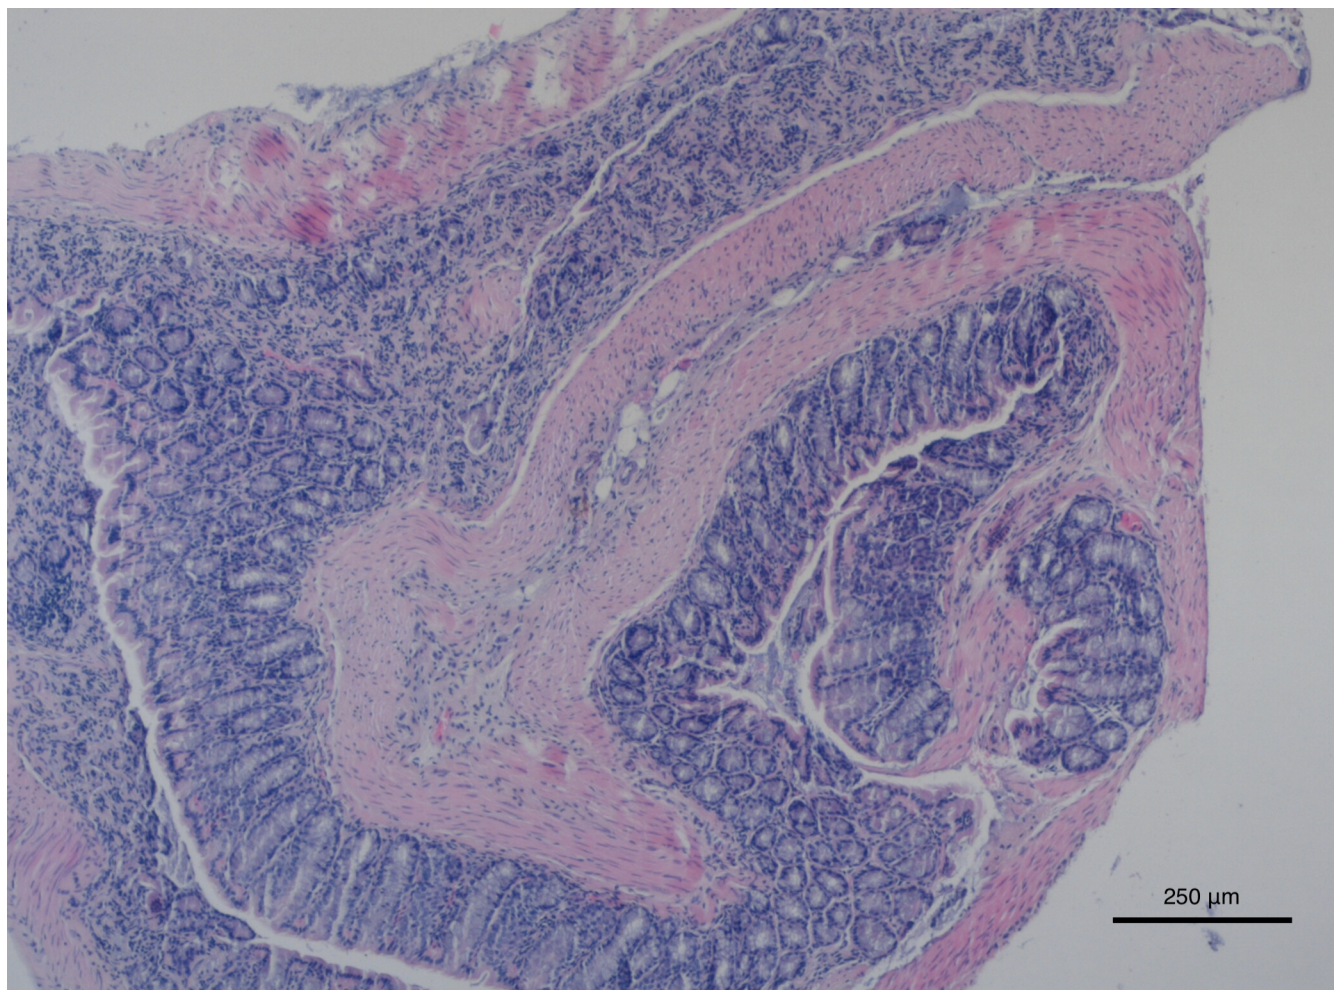

**Supplementary Fig. 5. Representative H&E-stained murine distal colonic section of *pfoA*<sup>+</sup> strain LH115.**

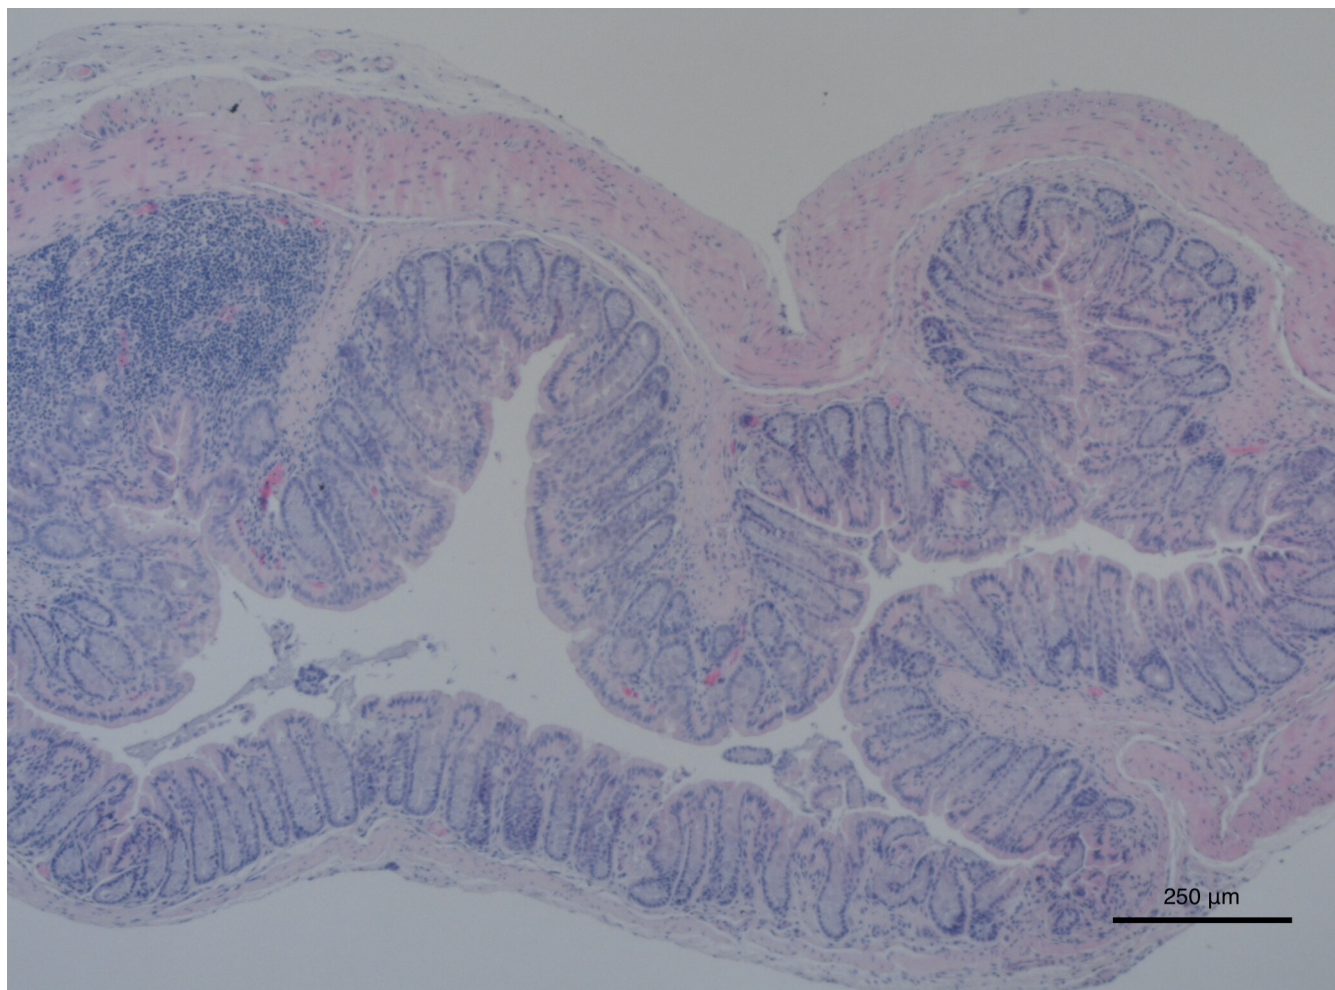

Supplementary Fig. 6. Representative H&E-stained murine distal colonic section of *pfoA*- strain LH043.



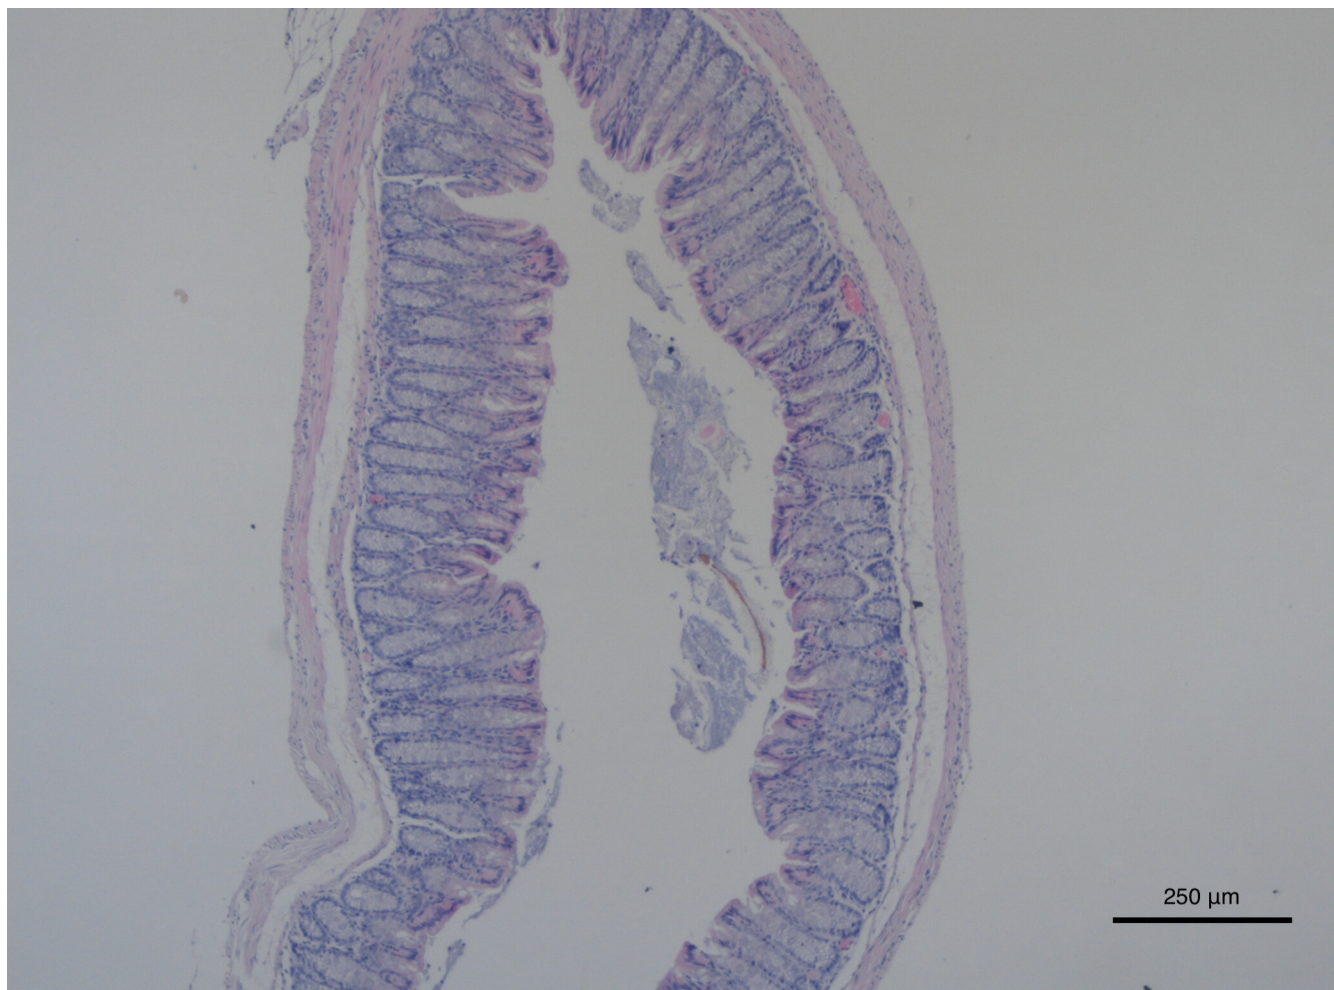

Supplementary Fig. 7. Representative H&E-stained murine distal colonic section of *pfoA*- strain IQ147.



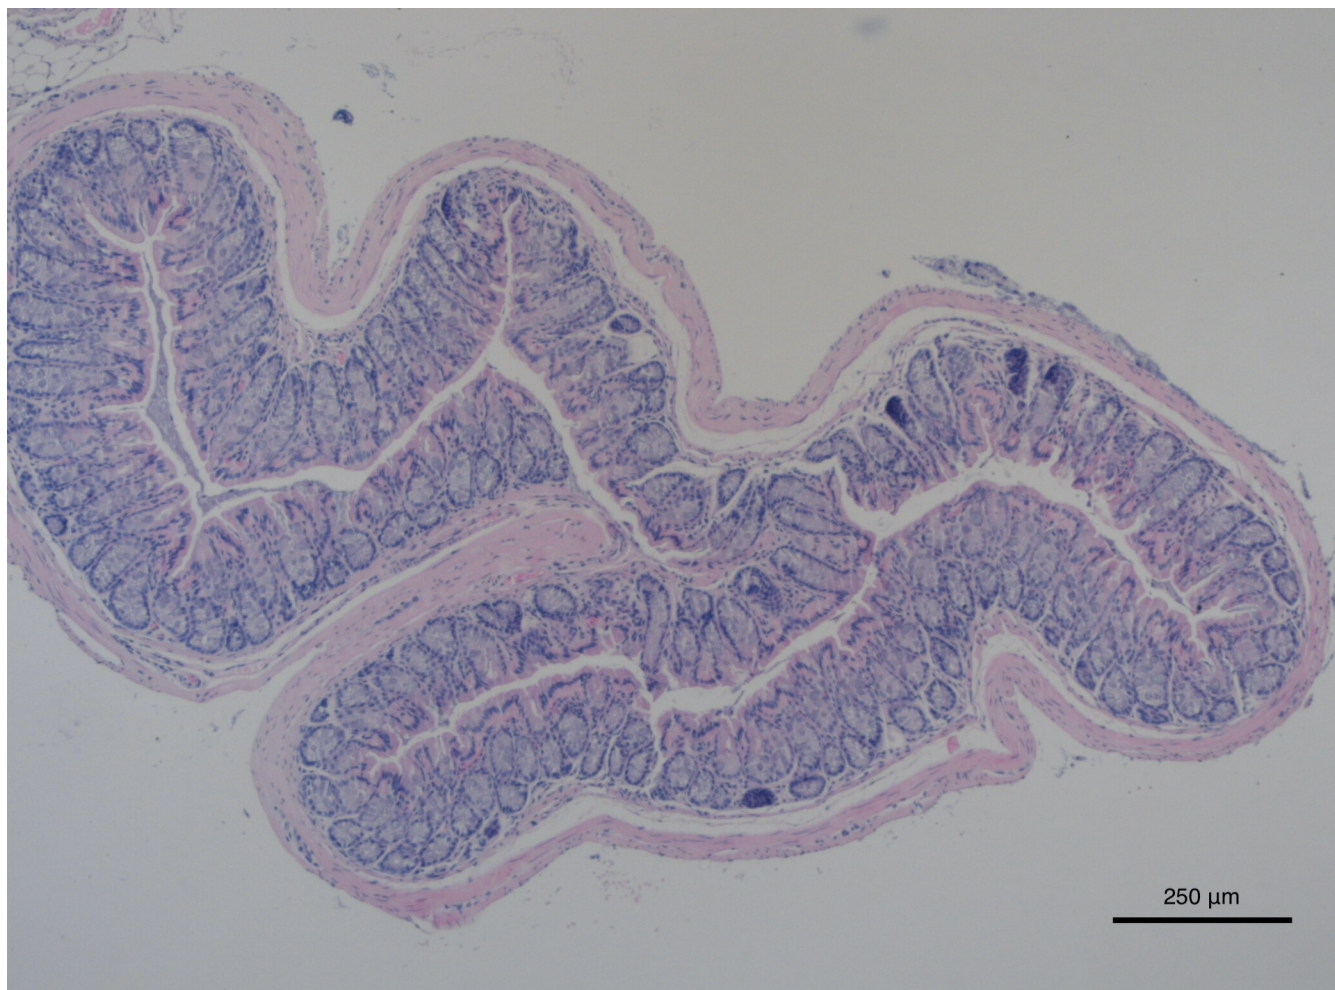

**Supplementary Fig. 8. Representative H&E-stained murine distal colonic section of *pfoA*- strain IQ133.**
